# Supplementary material for: Analysis of Stable Isotopes of Runoff Sources and their Implication in Hydropower Projects, Cases of Study of Manduriacu and Coca River Basins in Northern Ecuador
Source: Research Square preprint supplement (doi:10.21203/rs.3.rs-6413920/v1), 2025-05-08
Supplement: Supplementary file 1 [file 588fc86f0e5bed2eda06381d.docx]

**Table 1S:** Location of the stream samples and morphometric values of their watersheds, and rainfall sample’s location

|  | MORPHOMETRIC PARAMETERS IN WATERSHED | | | | | | | | | | | | COORDINATES CONTROL POINT | | | | | |
| --- | --- | --- | --- | --- | --- | --- | --- | --- | --- | --- | --- | --- | --- | --- | --- | --- | --- | --- |
| River | **Id** | | **Stream Order** | | **Hmean (m)** | | **Area (Km2)** | | **Drainage System** | | **H Max(m)** | | **Latitude** | | **Longitude** | | **Hmin (m) or Hsample** | |
| MASHPI | P1 |  | | 924 | | 90 | | Mashpi-Guayllabamba | | 1878 | | 0°11'18,25"N | | 78°55'35,92"O | | 500 | |
| MANDURIACU UPSTREAM LAKE | P2 | 6 | | 2810 | | 6978 | | Guayllabamba | | 5276 | | 0°12'58,04"N | | 78°54'15,44"O | | 495 | |
| MANDURIACU DOWNSTREAM | P2* | 6 | | 2810 | | 6978 | | Guayllabamba | | 5276 | | 0°12'55,50"N | | 78°54'54,91"O | | 454 | |
| SAN PEDRO | P3 | 4 | | 3355 | | 599 | | Guayllabamba | | 4431 | | 0°23'21,74"S | | 78°31'2,51"O | | 2628 | |
| GUAYLLABAMBA | P4 | 5 | | 3285 | | 2663 | | Guayllabamba | | 5126 | | 0° 4'7,76"S | | 78°22'21,13"O | | 1947 | |
| PITA | P5 | 4 | | 4069 | | 194 | | Guayllabamba | | 5867 | | 0°33'59,76"S | | 78°25'43,81"O | | 3626 | |
| CARIACU | P6 | 3 | | 4200 | | 19 | | Guayllabamba | | 5741 | | 0° 4'52,78"N | | 78° 4'30,11"O | | 3481 | |
| GRANOBLE | P7 | 5 | | 3434 | | 381 | | Guayllabamba | | 5275 | | 0° 0'30,90"N | | 78°10'31,97"O | | 2679 | |
| GUACHALA | P8 | 5 | | 3643 | | 369 | | Guayllabamba | | 5276 | | 0° 0'21,63"N | | 78°10'31,00"O | | 2645 | |
| ANTISANA | P9 | 3 | | 4411 | | 37 | | Coca | | 5675 | | 0°31'14,29"S | | 78°13'28,12"O | | 4014 | |
| PAPALLACTA | P10 | 3 | | 3955 | | 54 | | Coca | | 4394 | | 0°22'28,35"S | | 78°10'14,57"O | | 3425 | |
| QUIJOS | P11 | 5 | | 3175 | | 2400 | | Coca | | 5100 | | 0°24'1,27"S | | 77°49'15,93"O | | 1581 | |
| COCA RIVER INTAKE UPSTREAM | P12 | 6 | | 2986 | | 3703 | | Coca | | 5100 | | 0°12'3,79"S | | 77°41'11,60"O | | 1272 | |
| COCA RIVER INTAKE DOWNSTREAM | P12* | 6 | | 2986 | | 3703 | | Coca | | 5100 | | 0°11'14,70"S | | 77°41'3,32"O | | <1272 | |
| SALADO | P13 | 5 | | 2896 | | 923 | | Coca | | 5043 | | 0°12'4,01"S | | 77°42'0,82"O | | 1313 | |
| MALO | P14 |  | | 2298 | | 73 | | Malo-Coca | | 3479 | | 0° 9'10,57"S | | 77°38'28,73"O | | 1271 | |
| PAPALLACTA LAKE | P19 |  | | -- | | -- | | Coca | | --- | | 0°22'43,52"S | | 78° 9'18,14"O | | 3356 | |
| COCA RESERVOIR UP TURBINES | P18 |  | | -- | | -- | | Coca | | -- | | 0° 8'14,28"S | | 77°28'27,35"O | | 1224 | |
| DESCHARGE FROM TURBINES IN COCA | P17 |  | | -- | | -- | | Coca | | -- | | 0° 8'19,33"S | | 77°27'14,01"O | | 608 | |
| COCA RIVER BEFORE TURBINES OUTFLOW | P16 |  | | -- | | -- | | Coca | | -- | | 0° 8'13,28"S | | 77°27'14,01"O | | 605.5 | |
| COCA RIVER DOWNSTREAM TURBINES OUTFLOW | P20 |  | | -- | | -- | | Coca | | --- | | 0° 8'1,37"S | | 77°26'39,23"O | | 605 | |
| MICA LAKE | P15 |  | | -- | | -- | | Manduriacu | | - | | 0°32'27,50"S | | 78°12'43,92"O | | 3200 | |

**Table 2S:** Variation of the 𝛿18O (‰) in the stream samples points and rainfall (*no sample),

| **No** | **Description** | **ID** | **Latitude** | **Longitude** | **Sep-17** | **Oct-17** | **Nov-17** | **Dec-17** | **Jan-18** | **Feb-18** | **Feb-18 UNM** | **Mar-18** | **Apr-18** | **May-18** | **Jun-18** | **Jul-18** | **Aug-18** | **Mean** | **σ** |
| --- | --- | --- | --- | --- | --- | --- | --- | --- | --- | --- | --- | --- | --- | --- | --- | --- | --- | --- | --- |
| 1 | MANDURIACU DOWNSTREAM | P2* | 0°12'55,50"N | 78°54'54,91"O | -9,44 | -9,63 | -9,92 | -9,62 | -9,38 | * |  | * | * | * | * | * | * | -9,60 | 0,17 |
| 2 | MANDURIACU UPSTREAM | P2 | 0°12'58,04"N | 78°54'15,44"O | -9,42 | -9,18 | -9,96 | -9,61 | -9,38 | -8,22 | -8,24 | -6,87 | -10,65 | -9,46 | -10,25 | -9,70 | -9,32 | -9,33 | 0,90 |
| 3 | MASHPI RIVER | P1 | 0°11'18,25"N | 78°55'35,92"O | -5,85 | -5,83 | -6,07 | -5,80 | -6,00 | -5,65 | -5,74 | -4,46 | -5,98 | -6,09 | -6,01 | -6,83 | -5,84 | -5,87 | 0,53 |
| 4 | GUAYLLABAMBA RIVER | P4 | 0° 4'7,76"S | 78°22'21,13"O | -11,26 | -10,37 | -11,65 | -10,45 | -11,46 | -10,50 | -10,16 | -10,32 | -12,94 | -12,23 | -12,78 | -10,43 | -11,07 | -11,29 | 0,87 |
| 5 | PITA RIVER | P5 | 0°33'59,76"S | 78°25'43,81"O | -12,18 | -11,83 | -12,45 | -11,27 | -12,05 | -11,61 | -11,69 | -11,69 | -12,37 | -12,43 | -11,99 | -11,88 | -11,03 | -11,90 | 0,41 |
| 6 | MICA LAKE | P15 | 0°32'27,50"S | 78°12'43,92"O | * | -9,72 | -10,11 | -9,49 | * | -9,31 | * | * | * | * | * | * | -10,19 | -9,76 | 0,31 |
| 7 | ANTISANA STREAM | P9 | 0°31'14,29"S | 78°13'28,12"O | -14,51 | -14,30 | -14,90 | -14,26 | -14,70 | -14,17 | -14,20 | -12,05 | -14,73 | -14,36 | -12,20 | -14,42 | -14,24 | -14,07 | 0,86 |
| 8 | GUACHALA RIVER | P8 | 0° 0'21,63"N | 78°10'31,00"O | * | -10,81 | -12,13 | -11,01 | -11,92 | -11,33 | -11,34 | -11,69 | -12,80 | -13,20 | -12,64 | -11,69 | -11,04 | -11,84 | 0,72 |
| 9 | GRANOBLE RIVER | P7 | 0° 0'30,90"N | 78°10'31,97"O | -11,79 | -11,20 | -12,16 | -10,99 | -11,80 | -11,45 | -11,52 | -11,64 | -12,84 | -12,98 | -12,75 | -11,54 | -11,42 | -11.88 | 0,61 |
| 10 | COCA RIVER BEFORE TURBINES OUTFLOW | P16 | 0° 8'13,28"S | 77°27'13,69"O | -8,64 | -8,73 | -8,74 | -7,63 | -9,23 | -7,14 | -7,14 | -7,71 | -9,84 | -10,58 | * | * | * | -8,69 | 0,98 |
| 11 | DESCHARGE FROM TURBINES IN COCA | P17 | 0° 8'19,33"S | 77°27'14,01"O | -9,42 | -9,32 | -9,99 | -8,36 | -9,61 | -8,32 | -8,23 | -8,95 | -10,34 | -10,80 | * | * | * | -9,46 | 0,75 |
| 12 | RESERVOIR COCA UPSTREAM TURBINES | P18 | 0° 8'14,28"S | 77°28'27,35"O | -9,34 | -9,25 | -9,97 | -8,35 | -9,52 | -8,20 | -8,08 | -8,87 | -10,33 | -10,48 | * | * | * | -9,36 | 0,72 |
| 13 | MALO RIVER | P14 | 0° 9'10,57"S | 77°38'28,73"O | -8,43 | -8,28 | -9,54 | -7,46 | -8,44 | -7,46 | -7,10 | -8,13 | -11,52 | -9,34 | -9,25 | -9,11 | -7,82 | -8,73 | 1,04 |
| 14 | COCA RIVER MAIN INTAKE DOWNSTREAM | P12* | 0°11'14,70"S | 77°41'3,32"O | -9,06 | -9,01 | -9,82 | -8,35 | -9,55 | -8,17 | -8,17 | -8,91 | -10,86 | -10,67 | -10,67 | -10,26 | -9,29 | -9,55 | 0,84 |
| 15 | COCA RIVER INTAKE UPSTREAM | P12 | 0°12'3,79"S | 77°41'11,60"O | -9,19 | -9,32 | -9,87 | -8,35 | -9,55 | -8,01 | -8,08 | -8,88 | -11,04 | -10,56 | -10,69 | -10,12 | -9,31 | -9,58 | 0,85 |
| 16 | SALADO RIVER | P13 | 0°12'4,01"S | 77°42'0,82"O | -9,12 | -8,98 | -9,95 | -8,35 | -9,44 | -8,72 | -7.98 | -9,08 | -12,38 | -10,48 | -10,56 | -10,16 | -8,96 | -9,68 | 1,02 |
| 17 | QUIJOS RIVER IN SUMACO | P11 | 0°24'1,27"S | 77°49'15,93"O | -9,15 | -9,18 | -10,14 | -9,12 | -9,95 | -9,01 | -9.05 | -9,24 | -11,51 | -11,07 | -10,74 | -10,57 | -9,61 | -9,94 | 0,79 |
| 18 | TRIBUTARY OF PAPALLACTA LAKE | P10 | 0°22'28,35"S | 78°10'14,57"O | * | -11,17 | -11,69 | -10,87 | -11,44 | -10,94 | -10.96 | -11,16 | * | -12,27 | -11,85 | -11,59 | -10,82 | -11,38 | 0,43 |
| 19 | PAPALLACTA LAKE | P19 | 0°22'43,52"S | 78° 9'18,14"O | * | -10,93 | * | -10,61 | -11,43 | -10,73 | -10.74 | -10,91 | -11,20 | -9,33 | -12,04 | -11,66 | -11,53 | -11,23 | 0,42 |
| 20 | SAN PEDRO RIVER | P3 | 0°23'21,74"S | 78°31'2,51"O | * | * | -11,95 | * | -11,70 | -11,19 | -11,23 | * | * | -11,72 | -11,59 | * | -11,48 | -11,60 | 0,22 |
| 21 | COCA RIVER DOWNSTREAM TURBINES OUTFLOW | P20 | 0° 8'1,37"S | 77°26'39,23"O | * | * | -9,33 | -7,97 | * | -7,99 | -8.01 | -8,62 | * | -10,49 | * | * | * | -8,88 | 0,86 |
| 22 | CARIACU RIVER | P6 | 0° 4'52,78"N | 78° 4'30,11"O | -12,74 | * | -13,26 | -11,75 | -13,17 | -12,09 | -12.37 | -11,82 | -14,10 | * | -14,53 | -13,31 | -13,14 | -12,99 | 0,83 |

| **No.** | **Description** | **ID** | **sep-17** | **oct-17** | **nov-17** | **dic-17** | **ene-18** | **Feb-18** | **Feb-18 UNM** | **mar-18** | **abr-18** | **may-18** | **jun-18** | **jul-18** | **ago-18** | 𝛿Dmean | STD | 𝛿Dmax | 𝛿Dmin | Percentil 75% |
| --- | --- | --- | --- | --- | --- | --- | --- | --- | --- | --- | --- | --- | --- | --- | --- | --- | --- | --- | --- | --- |
| 1 | MANDURIACU DOWNSTREAM | P2* | -63.41 | -65.89 | -66.52 | -65.53 | -61.73 | * | * | * | * | * | * | * | * | -64,62 | 1,63 | -61,73 | -66,52 | -63,41 |
| 2 | MANDURIACU UPSTREAM | P2 | -63.56 | -61.48 | -66.14 | -65.41 | -61.88 | -54.01 | -50.17 | -41.12 | -72.41 | -64.92 | -70.15 | -65.85 | -63.32 | -62.52 | 7.48 | -41.12 | -72.41 | -61.78 |
| 3 | MASHPI RIVER | P1 | -33.31 | -33.50 | -33.62 | -33.79 | -34.04 | -33.24 | -28.64 | -21.95 | -34.76 | -36.39 | -34.72 | -41.34 | -33.93 | -33.72 | 4.33 | -21.95 | -41.34 | -33.45 |
| 4 | GUAYLLABAMBA RIVER | P4 | -79.20 | -69.19 | -80.74 | -72.57 | -80.13 | -74.36 | -72.59 | -77.21 | -92.18 | -87.40 | -92.12 | -71.73 | -78.98 | -79.651 | 6.96 | -69.19 | -92.18 | -73.92 |
| 5 | PITA RIVER | P5 | -86.05 | -84.81 | -86.86 | -80.56 | -85.17 | -83.54 | -81.02 | -84.48 | -88.64 | -89.86 | -86.43 | -84.47 | -77.76 | -84.89 | 3.02 | -77.76 | -89.86 | -84.23 |
| 6 | MICA LAKE | P15 | * | -72.20 | -72.82 | -70.27 | * | -70.17 | * | * | * | * | * | * | -75.43 | -72.18 | 1.76 | -70.17 | -75.43 | -70.27 |
| 7 | ANTISANA STREAM | P9 | -104.73 | -103.41 | -106.61 | -103.95 | -106.01 | -103.92 | -102.44 | -84.55 | -106.88 | -106.70 | -85.26 | -104.64 | -103.79 | -101.71 | 7.31 | -84.55 | -106.88 | -103.70 |
| 8 | GUACHALA RIVER | P8 | * | -75.11 | -84.16 | -76.33 | -81.99 | -79.74 | -79.00 | -80.11 | -89.20 | -93.84 | -87.87 | -79.79 | -75.36 | -82.14 | 5.54 | -75.11 | -94.84 | -78.03 |
| 9 | GRANOBLE RIVER | P7 | -83.49 | -75.99 | -84.90 | -76.73 | -82.36 | -80.87 | -79.78 | -80.77 | -90.63 | -92.76 | -89.25 | -79.33 | -81.32 | -83.20 | 4.89 | -75.99 | -92.76 | -80.41 |
| 10 | UP COCA RIVER DISCHARGE TURBINES | P16 | -52.72 | -55.05 | -53.33 | -47.35 | -58.40 | -42.68 | -40.5 | -45.90 | -63.95 | -70.37 | * | * | * | -54.42 | 7.91 | -42.68 | -70.37 | -47.35 |
| 11 | DESCHARGE FROM TURBINES IN COCA | P17 | -59.29 | -59.61 | -62.79 | -53.04 | -61.27 | -52.08 | -48.7 | -55.68 | -67.23 | -72.30 | * | * | * | -60.37 | 5.85 | -52.68 | -72.30 | -55.68 |
| 12 | RESERVOIR COCA UPSTREAM TURBINES | P18 | -58.51 | -59.51 | -62.76 | -52.77 | -60.90 | -51.31 | -49.4 | -54.99 | -67.23 | -71.18 | * | * | * | -59.91 | 5.84 | -51.31 | -71.18 | -54.99 |
| 13 | MALO RIVER | P14 | -51.12 | -52.12 | -59.24 | -45.30 | -51.60 | -45.73 | -41.8 | -48.68 | -76.55 | -60.89 | -58.93 | -56.74 | -46.07 | -54.42 | 8.16 | -45.30 | -76.55 | -48.02 |
| 14 | COCA RIVER MAIN INTAKE DOWNSTREAM | P12* | -56.90 | -57.87 | -61.71 | -52.53 | -60.76 | -50.96 | -47.5 | -55.62 | -71.07 | -71.52 | -70.47 | -66.23 | -58.03 | -61.14 | 6.60 | -50.96 | -71.52 | -56.58 |
| 15 | COCA RIVER INTAKE UPSTREAM | P12 | -57.53 | -59.94 | -61.81 | -52.48 | -60.61 | -50.03 | -47.0 | -55.74 | -72.62 | -70.67 | -70.51 | -64.94 | -58.42 | -61.28 | 6.65 | -50.03 | -72.62 | -57.08 |
| 16 | SALADO RIVER | P13 | -57.71 | -58.39 | -62.63 | -52.21 | -59.55 | -55.41 | -49.17 | -56.58 | -82.90 | -69.37 | -69.65 | -65.08 | -54.39 | -61.99 | 7.96 | -52.21 | -82.90 | -56.28 |
| 17 | QUIJOS RIVER IN SUMACO | P11 | -57.64 | -60.95 | -64.37 | -59.16 | -64.18 | -58.00 | -55.41 | -58.85 | -76.21 | -74.89 | -71.57 | -68.94 | -60.75 | -64.63 | 6.15 | -57.64 | -76.21 | -59.08 |
| 18 | TRIBUTARY OF PAPALLACTA LAKE | P10 | * | -76.44 | -79.25 | -75.28 | -78.36 | -76.07 | -75.63 | -76.46 | * | -85.37 | -81.53 | -79.18 | -72.49 | -78.05 | 3.25 | -72.49 | -85.37 | -76.16 |
| 19 | PAPALLACTA LAKE | P19 | * | -75.40 | * | -74.25 | -79.01 | -75.70 | -74.05 | -74.99 | -77.25 | -78.52 | -83.84 | -80.27 | -78.88 | -77.73 | 2.76 | -74.25 | -83.84 | -75.40 |
| 20 | SAN PEDRO RIVER | P3 | * | * | -82.87 | * | -82.14 | -79.93 | -78.70 | * | * | -83.68 | -82.17 | * | -81.06 | -81.98 | 1.12 | -79.93 | -83.68 | -81.33 |
| 21 | COCA RIVER DOWNSTREAM OF JUNCTION TURBINES | P20 | * | * | -57.62 | -49.86 | * | -50.38 | -48.71 | -53.53 | -53.53 | -70.00 | * | * | * | -55.82 | -6.32 | -49.86 | -70.00 | -51.17 |
| 22 | CARIACU RIVER | P6 | -90.49 | * | -91.96 | -82.78 | -92.62 | -87.57 | -86.09 | -82.34 | -99.86 | * | -105.18 | -94.61 | -93.34 | -92.08 | 6.36 | -82.34 | -105.18 | -88.30 |

**Table 3s:** Variation of the 𝛿D (‰) in the stream samples points and rainfall (*no sample).

**Table 4s:** Monthly rainfall isotope data collected in Hydropower Projects

| δ18O | ID | Sept-17 | Oct-17 | Nov-17 | Dec-17 | Jan-18 | Feb-18 | Feb-18 UNM | Mar-18 | Apr-18 | May-18 | Jun-18 | Jul-18 | Aug-18 |
| --- | --- | --- | --- | --- | --- | --- | --- | --- | --- | --- | --- | --- | --- | --- |
| PITA | R15 | * | * | -14.23 | -8.34 | -14.01 | -8.92 | -8.91 | -7.81 | -14.97 | * | -11.33 | -10.49 | -15.28 |
| CARIACU | R16 | * | * | * | -8.60 | -14.74 | * | -8.66 | -8.56 | -16.38 | -21.78 | -14.07 | -10.06 | -14.29 |
| MANDURIACU | R12 | * | -5.39 | -2.43 | -3.18 | -6.46 | -3.27 | -7.90 | -3.76 | -5.34 | -11.91 | -3.34 | -3.19 | -4.65 |
| ANTISANA | R13 | * | -12.34 | -17.82 | * | -16.77 | * |  | -7.33 | -18.13 | * | -14.35 | -12.89 | -12.03 |
| COCA | R14 | * | -7.80 | -10.13 | -4.40 | -7.70 | -2.34 | -2.33 | -3.26 | -11.33 | -16.02 | -9.41 | -6.97 | -5.27 |

| δD | ID | Sept-17 | Oct-17 | Nov-17 | Dec-17 | Jan-18 | Feb-18 |  | Mar-18 | Apr-18 | May-18 | Jun-18 | Jul-18 | Aug-18 |
| --- | --- | --- | --- | --- | --- | --- | --- | --- | --- | --- | --- | --- | --- | --- |
| PITA | R15 | * | * | -104.35 | -52.84 | -99.92 | -56.06 | -54.6 | -46.50 | -106.44 | * | -82.90 | -77.05 | -111.01 |
| CARIACU | R16 | * | * | * | -55.72 | -108.80 | 54.76 | -54.8 | -52.60 | -118.12 | -162.24 | -106.24 | -71.21 | 105.97 |
| MANDURIACU | R12 | * | -29.14 | -5.82 | -13.19 | -39.19 | -13.00 | -3.38 | -16.55 | -30.90 | -83.89 | -15.95 | -13.11 | -27.58 |
| ANTISANA | R13 | * | -84.24 | -128.62 | * | -121.39 | * | * | -42.80 | -130.78 | * | -104.69 | -89.43 | -81.10 |
| COCA | R14 | * | -49.61 | -67.85 | -22.29 | -49.520 | -3.44 | -3.1 | -10.46 | -77.79 | -117.79 | -62.17 | -40.77 | -26.87 |

**Table 5s:** Rainfall station with isotope data from the IAEA and INAMHI.

| METEOROLOGICAL STATION | INSTITUTION | NAME | LATITUDE | LONGITUDE | ELEVATION | WATERSHED |
| --- | --- | --- | --- | --- | --- | --- |
| ESMERALDAS | INAMHI-IAEA | R6 | 0.966667 | -79.633331 | 30 | MHP |
| ALLURIQUIN | INAMHI-IAEA | R2 | -0.316667 | -78.966667 | 850 | MHP |
| IZOBAMBA | INAMHI-IAEA | R3 | -0.37 | -78.550003 | 3058 | MHP |
| LA CONCORDIA | INAMHI-IAEA | R4 | 0.104722 | -79.283333 | 360 | MHP |
| QUITO-INAMHI | INAMHI-IAEA | R1 | -0.166667 | -78.48333 | 2789 | MHP |
| PITA | FIELD 17-18 | R15 | -0.566864 | -78.429554 | 3626 | MHP |
| CARIACU | FIELD 17-18 | R16 | 0.081394 | -78.075192 | 3481 | MHP |
| MANDURIACU | FIELD 17-18 | R12 | 0.217593 | -78.89273 | 511 | MHP |
| LAGO AGRIO | INAMHI-IAEA | R3 | 0.083333 | -76.866669 | 297 | CCSHP |
| CUYUJA | INAMHI-IAEA | R8 | -0.413889 | -78.026665 | 2380 | CCSHP |
| PAPALLACTA | INAMHI-IAEA | R7 | -0.377778 | -78.14167 | 3150 | CCSHP |
| ANTISANA | FIELD 17-18 | R13 | -0.518811 | -78.224156 | 4014 | CCSHP |
| COCA | FIELD 17-18 | R14 | -0.203592 | -77.688568 | 1303 | CCSHP |
| BAEZA | INAMHI-IAEA | R9 | -0.463889 | -77.890556 | 1960 | CCSHP |
| EL CHACO | INAMHI-IAEA | R10 | -0.338056 | -77.809998 | 1600 | CCSHP |
